# Supplementary material for: IL-12 signaling drives the differentiation and function of a TH1-derived TFH1-like cell population
Source: PubMed Central journal article supplement (PMC6769002; doi:10.1038/s41598-019-50614-1), 2019-09-30
Supplement: 41598_2019_50614_MOESM1_ESM.pdf [file 41598_2019_50614_MOESM1_ESM.pdf]

## **Supplementary material associated with:**

**Title:** IL-12 signaling drives the differentiation and function of a T<sub>H</sub>1-derived T<sub>FH1</sub>-like cell population

**Authors:** Michael D. Powell, Kaitlin A. Read, Bharath K. Sreekumar, Devin M. Jones & Kenneth J. Oestreich

## Supplementary Figure 1

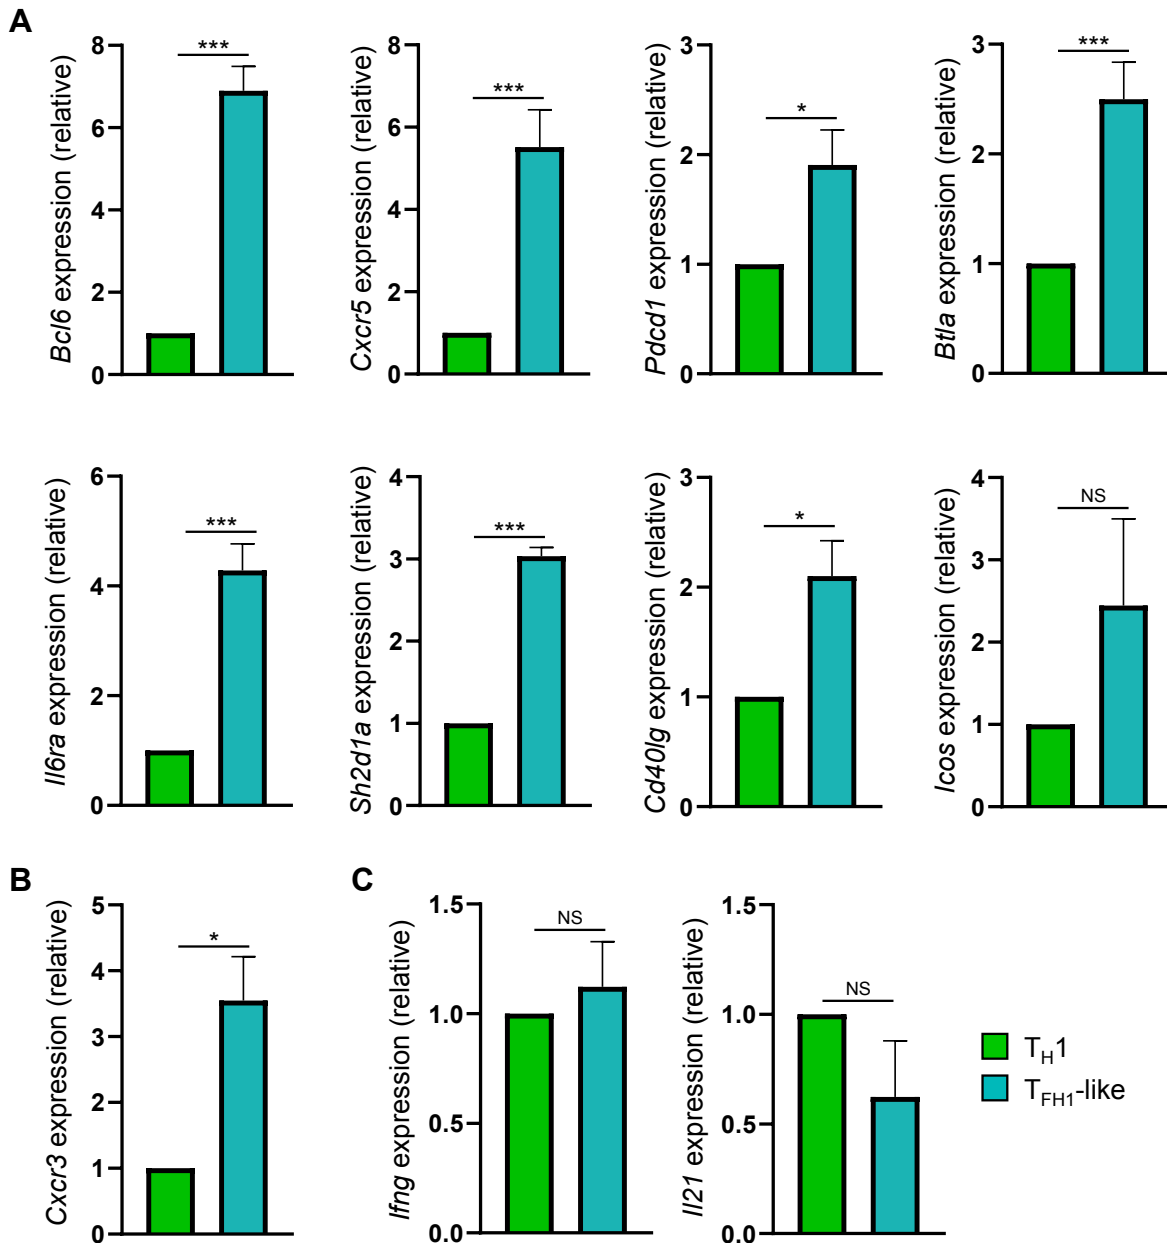

**Supplementary Figure 1. TH1-derived TH1-like cells express genes associated with TH differentiation and function. (A-C) qRT-PCR analysis of the indicated genes in TH1 and TH1-like cells. For 'C', cells were stimulated for 2h with PMA and Ionomycin prior to harvest and analysis of gene expression. Samples were normalized to *Rps18* and are represented relative to the TH1 sample (mean of  $n = 4-8 \pm$  s.e.m.). \* $P < 0.05$ , \*\* $P < 0.01$ , \*\*\* $P < 0.001$ ; unpaired Student's *t*-test).**

## Supplementary Figure 2

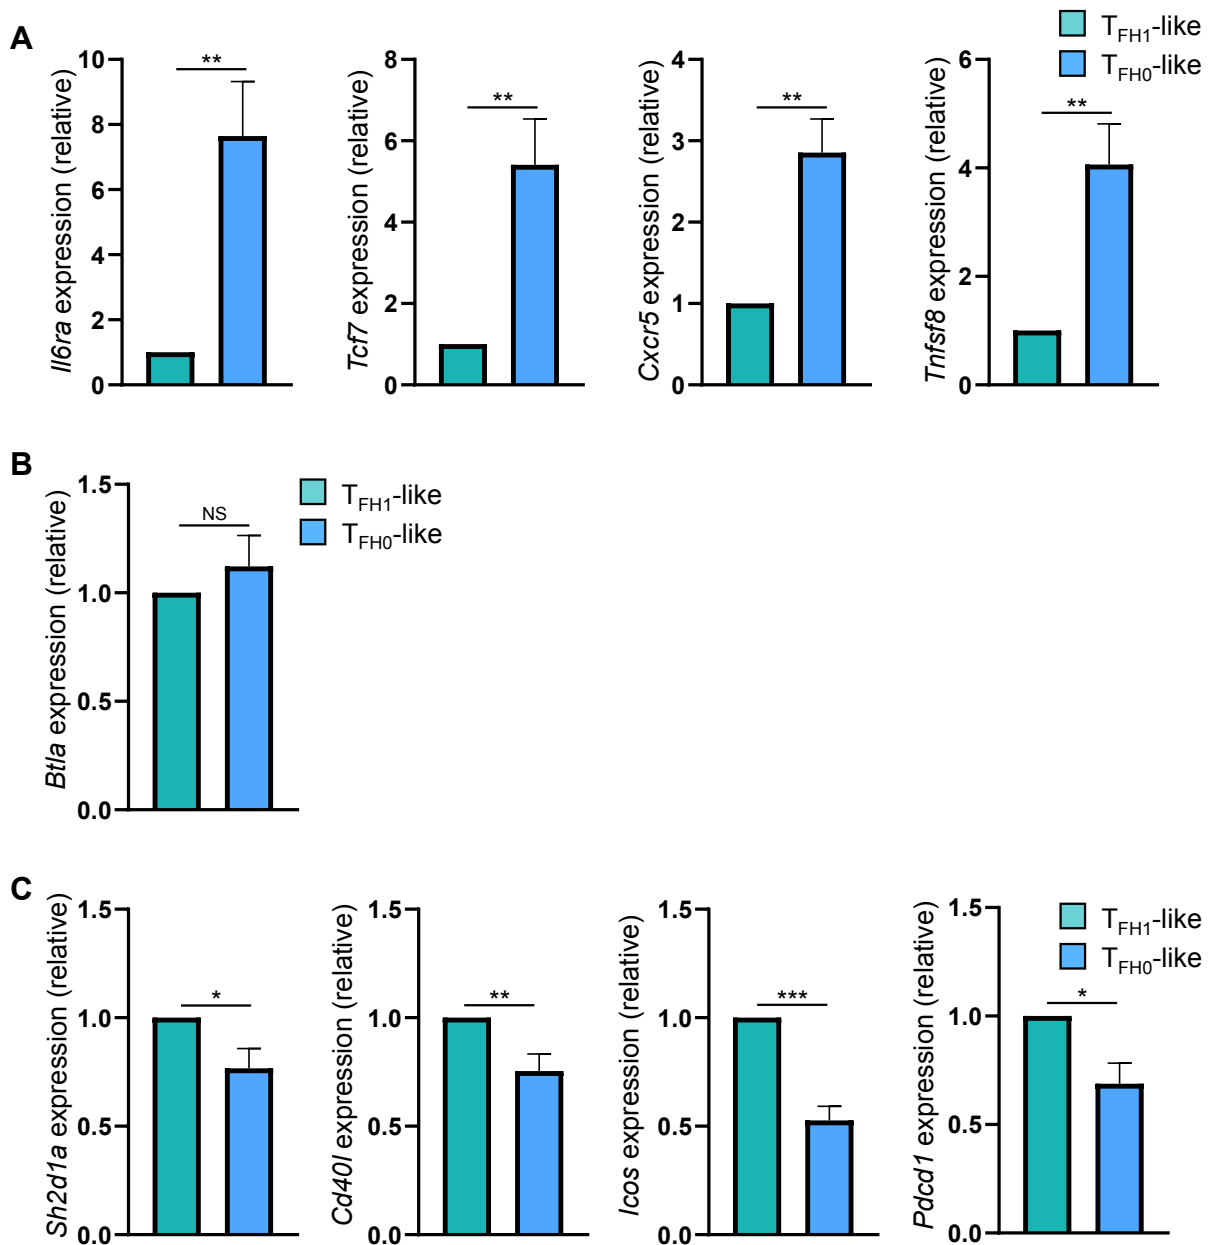

**Supplementary Figure 2. T<sub>FH</sub>-associated genes are differentially expressed between T<sub>FH1</sub>- and T<sub>FH0</sub>-like cell populations. (A-C) qRT-PCR analysis of the indicated genes in T<sub>FH1</sub>-like and T<sub>FH0</sub>-like cells. Samples were normalized to *Rps18* and are represented relative to the T<sub>FH1</sub>-like sample (mean of  $n = 4-8 \pm$  s.e.m.). \* $P < 0.05$ , \*\* $P < 0.01$ , \*\*\* $P < 0.001$ ; unpaired Student's *t*-test).**

### Supplementary Figure 3

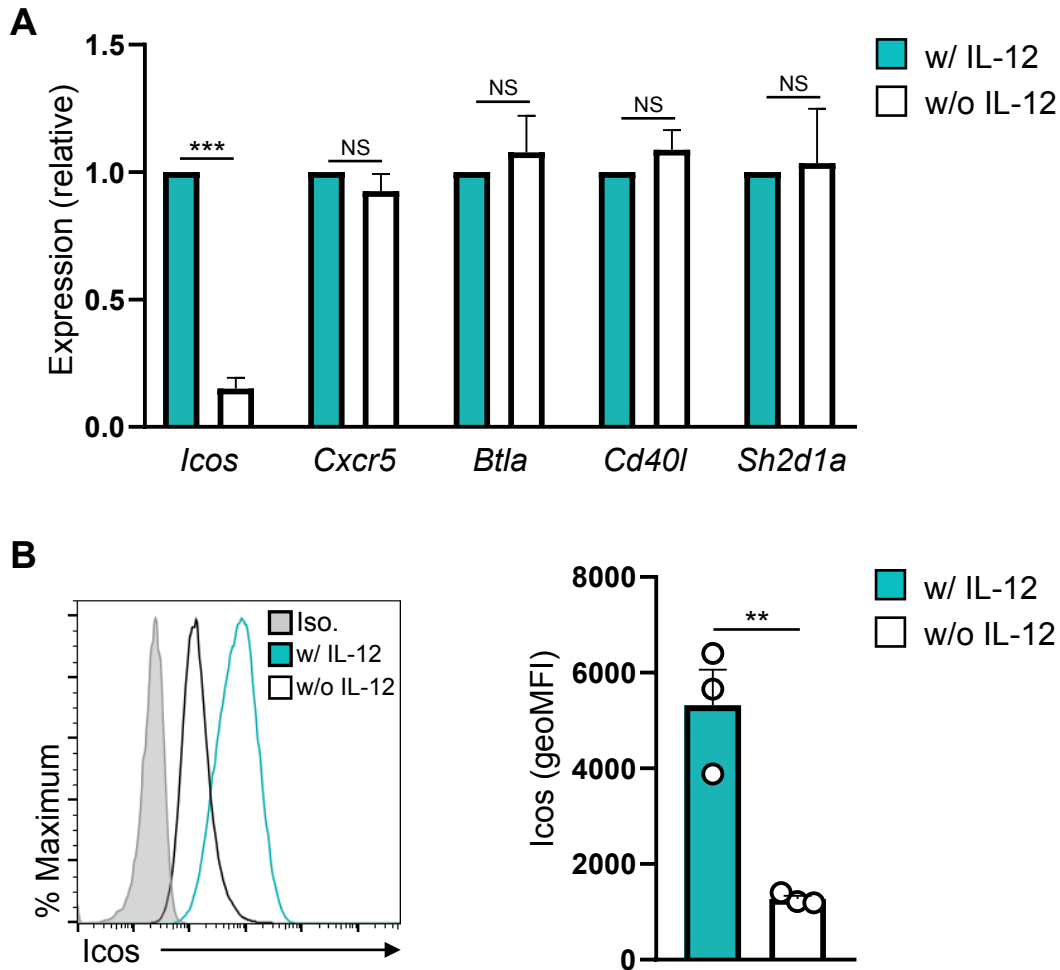

### Supplementary Figure 3. *Icos* expression in $T_{FH1}$ -like cells is dependent on IL-12

**signaling.** (A) qRT-PCR analysis of indicated genes in  $T_{FH1}$ -like cells cultured in the presence and absence of IL-12. Samples were normalized to *Rps18* and are represented relative to the  $T_{FH1}$ -like sample cultured with IL-12 (mean of  $n = 3 \pm$  s.e.m.). (B) Flow cytometry analysis of *Icos* expression on  $T_{FH1}$ -like cells cultured with or without IL-12. Shown are representative data from three independent experiments. Mean fluorescence intensity (MFI) is also shown (mean of  $n = 3 \pm$  s.e.m.). \*\* $P < 0.01$ , \*\*\* $P < 0.001$ ; unpaired Student's *t*-test.

## Supplementary Figure 4

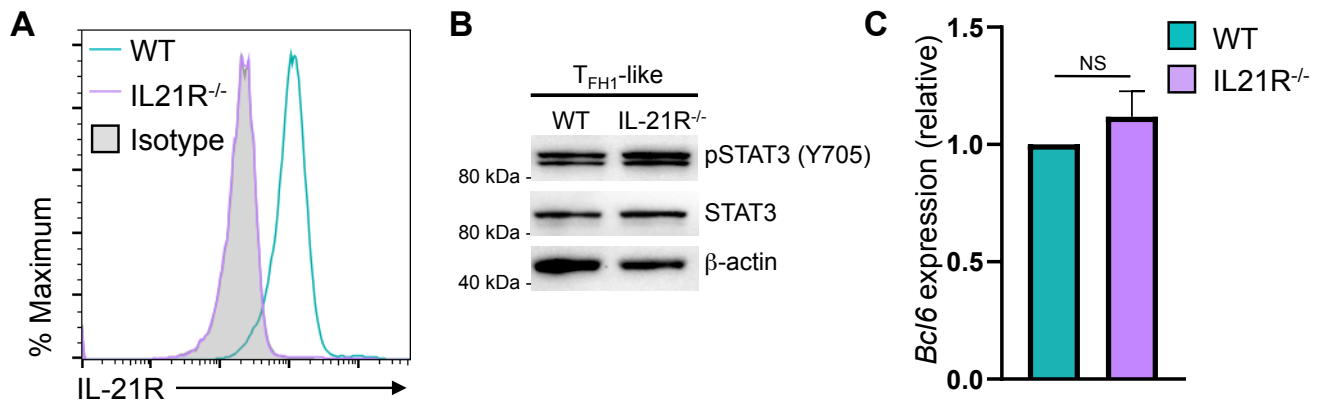

**Supplementary Figure 4. STAT3 activation and *Bcl6* expression are independent of autocrine signals from IL-21 in T<sub>FH1</sub>-like cells. (A)** Flow cytometry analysis of IL-21R cell surface expression on wildtype (WT) and IL-21R<sup>-/-</sup> T<sub>FH1</sub>-like cells (to confirm IL-21R deletion). Shown are representative data from three independent experiments. **(B)** Immunoblot analysis of STAT3 activation (pSTAT3 Y705) in WT and IL-21R<sup>-/-</sup> T<sub>FH1</sub>-like cells. STAT3 and β-actin are shown as controls for total STAT3 and equal protein loading, respectively. Image shown is representative of three independent experiments. **(C)** qRT-PCR analysis of *Bcl6* transcript expression in WT and IL-21R<sup>-/-</sup> T<sub>FH1</sub>-like cells. Data were normalized to *Rps18* and are presented relative to the WT sample (mean of  $n = 3 \pm$  s.e.m.).

## Supplementary Figure 5

Figure 1c

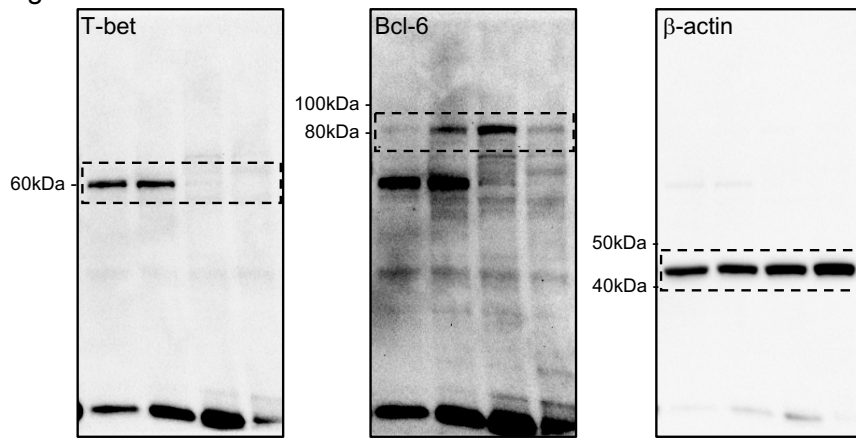

Figure 5b

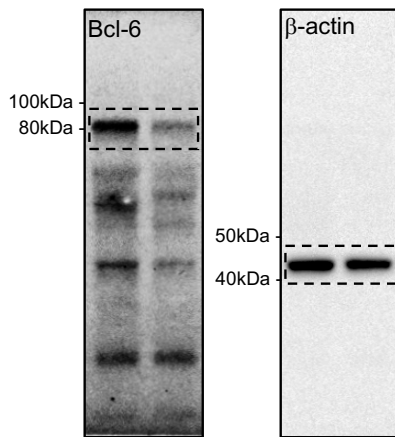

Figure 6a

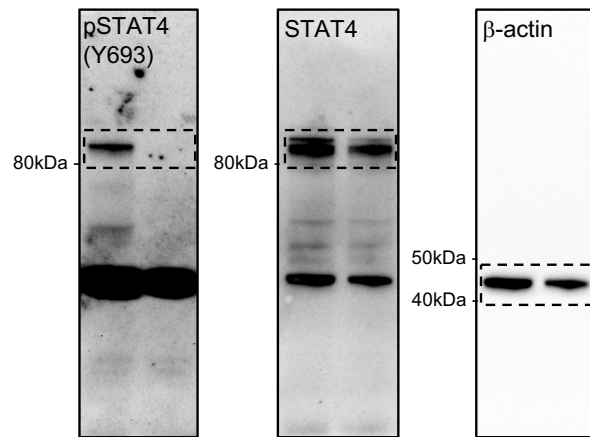

Figure 6e

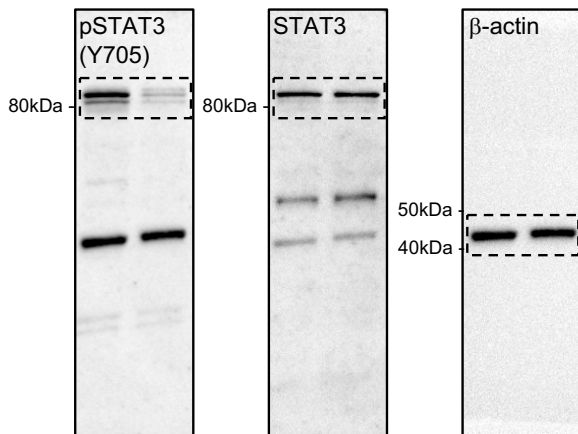

Supplemental Figure 4

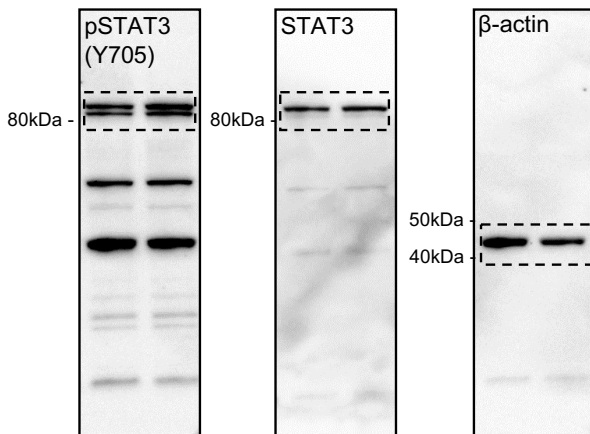

Supplementary Figure 5. Original and uncropped scans of immunoblots.
